# Supplementary material
Source: PubMed Central journal article supplement (PMC7137905)
Supplement: NIHMS1570851-supplement-Supp_AppendixS1.pdf [file NIHMS1570851-supplement-Supp_AppendixS1.pdf]

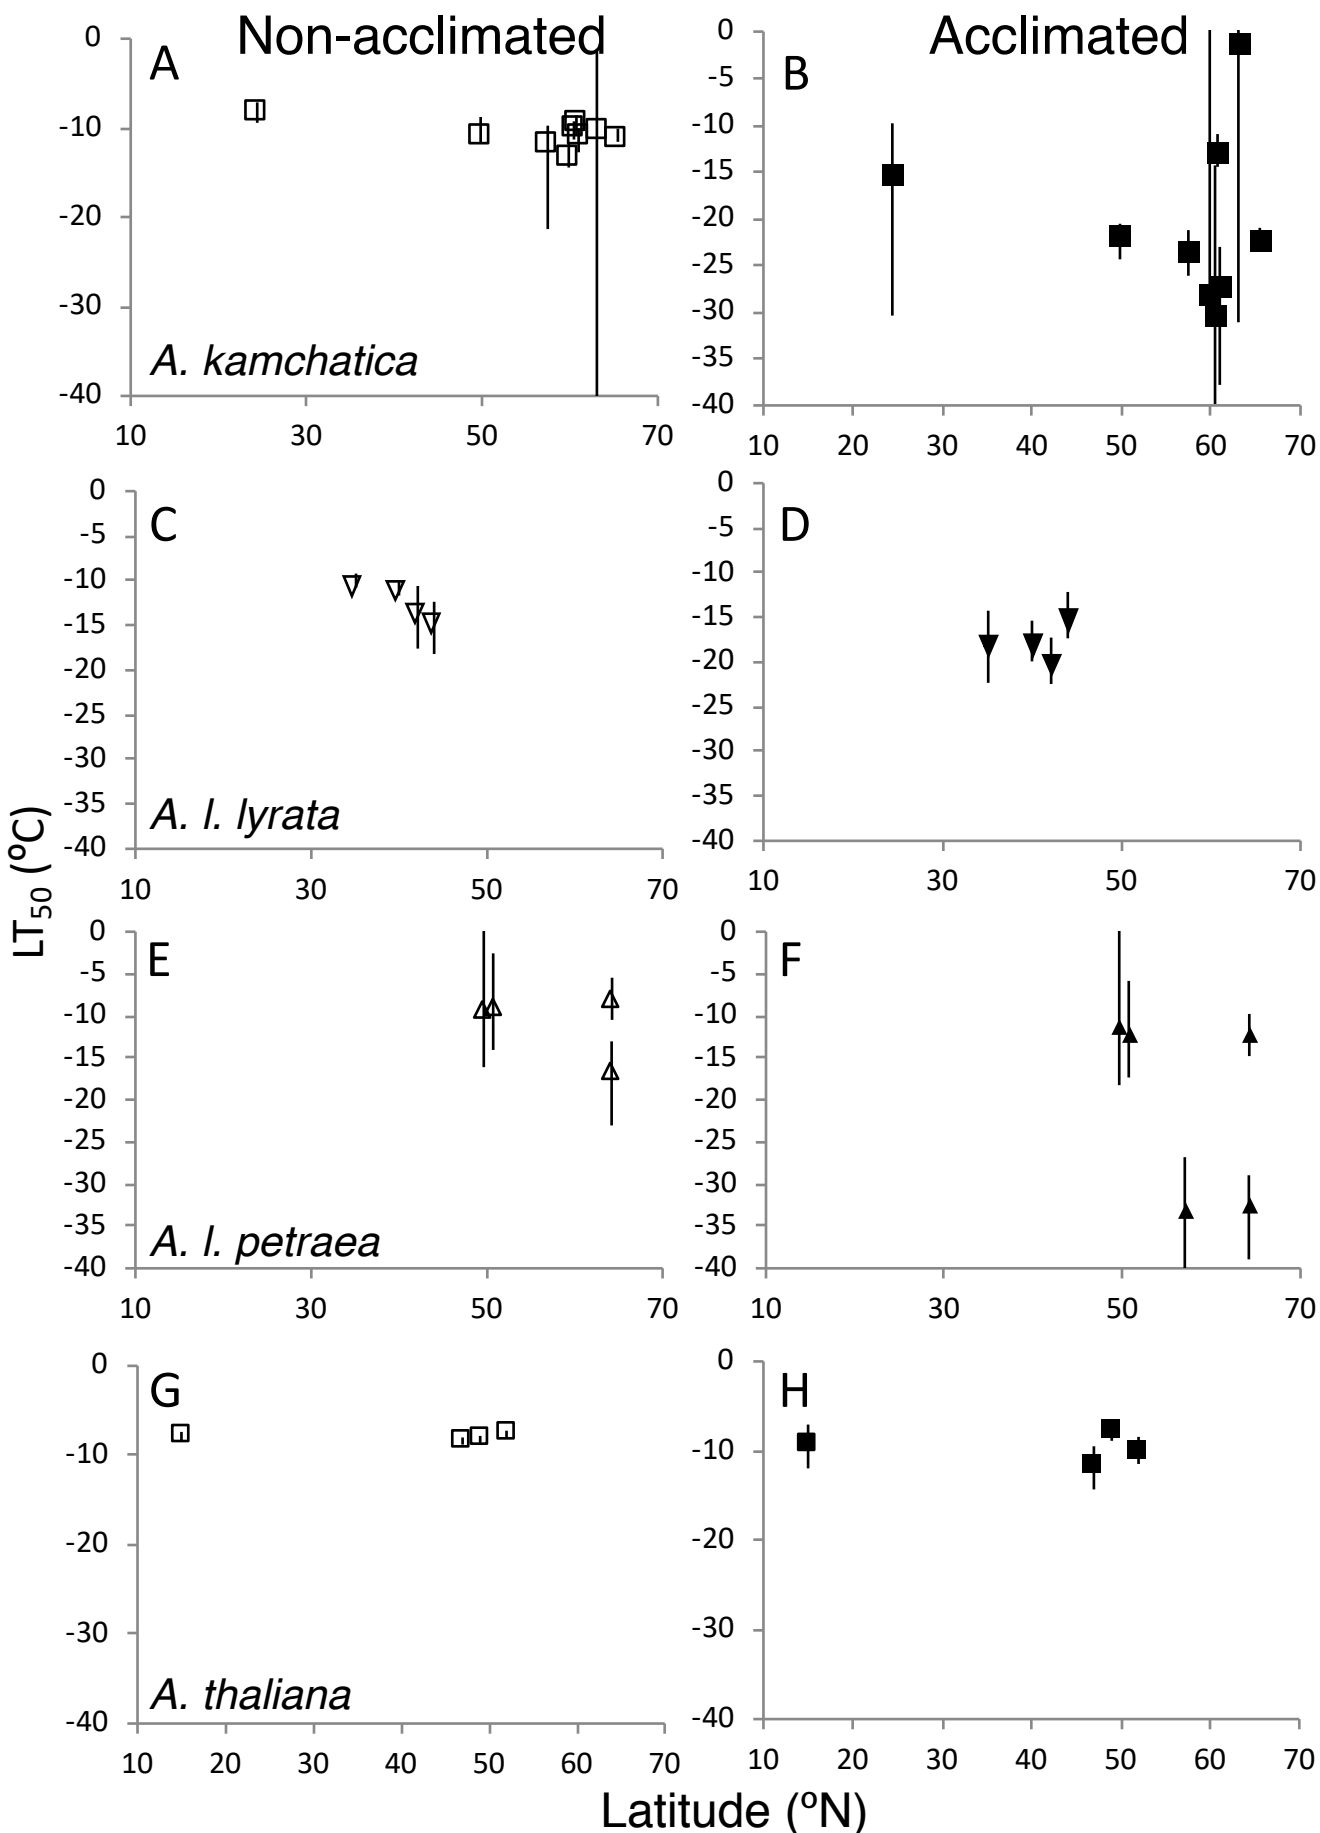

Appendix S1. Mean lethal temperature ( $LT_{50}$ ) for each population before (open symbols) and after (closed symbols) cold acclimation and latitude of origin: *A. kamchatica* (A, B), *A.l. lyrata* (C, D), *A.l. petraea* (E, F), *A. thaliana* (G, H). Error bars represent 95% confidence intervals around the estimates. Note: Points for *A. thaliana* accessions Col and Ler are overlapping.
